# Supplementary material for: Predicting the Unpredictable: Machine Learning's Role in Sepsis Cardiac Arrest Mortality
Source: Research Square preprint supplement (doi:10.21203/rs.3.rs-7635257/v1), 2025-09-30
Supplement: Supplementary file 1 [file 821e49bc3d0b2e9a9ad5aed7.docx]

# Supplementary Materials

**Table of Contents**

**Tables**

Table S1. Missing number and percentage of variables in the dataset …… p.1

Table S2. LASSO regression variable selection process …… p.4

Table S3. Baseline characteristics of test and training sets …… p.12

Table S4. Hyperparameters and selected settings for each algorithm …… p.16

Table S5. Multi-model classification — Training set results …… p.17

Table S6. Multi-model classification — Validation set results …… p.17

Table S7. Z-value averages for DeLong test across models …… p.19

Table S8. P-value means for DeLong test across models …… p.19

Table S9. Predictive performance of the Random Forest (RF) model …… p.26

Table S10. Abbreviations of Variables and Methods …… p.31

**Figures**

Figure S1. Coefficient profile plot of the LASSO regression model …… p.7

Figure S2. Cross-validation curve for LASSO regression …… p.7

Figure S3. Variable selection using the Boruta method …… p.8

Figure S4. SVM-RFECV results (18 selected predictors) …… p.9

Figure S5. RFECV results (28 selected predictors) …… p.10

Figure S6. Correlation heatmap of candidate predictors …… p.11

Figure S7. ROC curves of nine models in the training cohort …… p.19

Figure S8. ROC curves of nine models in the validation cohort …… p.20

Figure S9. Forest plot of AUC distributions …… p.21

Figure S10. Decision curve analysis (DCA) in the validation cohort …… p.22

Figure S11. Calibration curves of machine learning models …… p.23

Figure S12. Precision–recall curves (training cohort) …… p.24

Figure S13. Precision–recall curves (validation cohort) …… p.25

Figure S14. Learning curves of the Random Forest (RF) model …… p.27

Figure S15. Calibration plot of the RF model (test cohort) …… p.28

Figure S16. Decision curve analysis (DCA) in the test cohort …… p.29

Figure S17. Kolmogorov–Smirnov (KS) curve of the RF model …… p.30

**Acknowledgment**

Acknowledgment of MIMIC-IV database contributors and Extreme Smart Analysis platform …… p.34

# Table S1. Missing number and percentage of variables in the dataset.

| Number | Variables | Missing Count | MissingPercent (%) |
| --- | --- | --- | --- |
| 1 | Gender | 0 | 0.00% |
| 2 | MI | 0 | 0.00% |
| 3 | CHF | 0 | 0.00% |
| 4 | CBD | 0 | 0.00% |
| 5 | CPD | 0 | 0.00% |
| 6 | Diabetes_with_cc | 0 | 0.00% |
| 7 | Renal_disease | 0 | 0.00% |
| 8 | Malignant_cancer | 0 | 0.00% |
| 9 | Severe_liver_disease | 0 | 0.00% |
| 10 | Metastatic_solid_tumor | 0 | 0.00% |
| 11 | APSⅢ | 0 | 0.00% |
| 12 | SOFA | 0 | 0.00% |
| 13 | Age | 0 | 0.00% |
| 14 | Lactate | 268 | 18.73% |
| 15 | pH | 268 | 18.73% |
| 16 | SO2 | 268 | 18.73% |
| 17 | PO2 | 268 | 18.73% |
| 18 | PCO2 | 268 | 18.73% |
| 19 | TotalCO2 | 268 | 18.73% |
| 20 | CCI | 0 | 0.00% |
| 21 | Hct | 2 | 0.14% |
| 22 | Hb | 3 | 0.21% |
| 23 | PLT | 2 | 0.14% |
| 24 | WBC | 3 | 0.21% |
| 25 | Albumin | 187 | 13.07% |
| 26 | AG | 3 | 0.21% |
| 27 | Bicarbonate | 3 | 0.21% |
| 28 | BUN | 2 | 0.14% |
| 29 | Calcium | 60 | 4.19% |
| 30 | Chloride | 3 | 0.21% |
| 31 | Cr | 2 | 0.14% |
| 32 | Sodium | 3 | 0.21% |
| 33 | Potassium | 3 | 0.21% |
| 34 | Fibrinogen | 174 | 12.16% |
| 35 | INR | 38 | 2.66% |
| 36 | PT | 36 | 2.52% |
| 37 | PTT | 40 | 2.80% |
| 38 | ALT | 198 | 13.84% |
| 39 | ALP | 198 | 13.84% |
| 40 | AST | 185 | 12.93% |
| 41 | Amylase | 156 | 10.90% |
| 42 | Bilirubin_total | 133 | 9.29% |
| 43 | Ck-CPK | 134 | 9.36% |
| 44 | CK-MB | 134 | 9.36% |
| 45 | LDH | 254 | 17.75% |
| 46 | HR | 3 | 0.21% |
| 47 | SBP | 14 | 0.98% |
| 48 | DBP | 14 | 0.98% |
| 49 | MBP | 3 | 0.21% |
| 50 | RR | 3 | 0.21% |
| 51 | Temperature | 210 | 14.68% |
| 52 | SPO2 | 6 | 0.42% |
| 53 | Glucose | 2 | 0.14% |
| 54 | Gcs_min | 2 | 0.14% |

**Table S2. Comparison of baseline characteristics for the test and training sets in the model screening phase.**

| **Variables** | **Total** | **Validation** | **Training** | ***P*** |
| --- | --- | --- | --- | --- |
| N | 1431 | 430 | 1001 | - |
| Age(years old)  **Median (Q1, Q3)** | 67.00 (56.00, 78.00) | 68.00 (55.00, 78.00) | 67.00 (56.00, 77.00) | 0.649 |
| **Gender n (%)** |  |  |  | 0.326 |
| Female | 540(37.74) | 154(35.81) | 386(38.56) |  |
| Male | 891(62.26) | 276(64.19) | 615(61.44) |  |
| **Vital Signs on ICU Admission, Median (Q1, Q3)** | | | | |
| HR,(bmp) | 66.00 (56.00, 79.00) | 66.00 (56.00, 80.00) | 66.00 (57.00, 79.00) | 0.766 |
| SBP,(mmHg) | 146.00(132.00,163.00) | 148.00(133.25,165.00) | 145.00(131.00,162.00) | 0.051 |
| DBP,(mmHg) | 43.00 (36.00, 50.00) | 44.00 (36.00, 51.75) | 43.00 (36.00, 50.00) | 0.407 |
| MBP,(mmHg) | 56.00 (47.00, 62.00) | 56.00 (48.00, 64.00) | 55.00 (47.00, 62.00) | 0.094 |
| RR,(bpm) | 28.00 (24.00, 32.00) | 28.00 (24.00, 32.38) | 28.00 (24.50, 32.00) | 0.423 |
| Temperature,(℃) | 37.24 (36.83, 37.72) | 37.24 (36.78, 37.72) | 37.22 (36.89, 37.72) | 0.359 |
| SpO2,(%) | 92.00 (89.00, 95.00) | 93.00 (89.00, 96.00) | 92.00 (89.00, 95.00) | **0.056** |
| **Laboratory parameters on ICU admission, Median (Q1, Q3)** | | | | |
| WBC count,(103/μL) | 10.30 (7.10, 13.70) | 9.90 (6.65, 13.50) | 10.40 (7.30, 13.90) | 0.103 |
| Hematocrit | 30.40 (25.45, 36.10) | 31.15 (26.20, 36.58) | 30.10 (25.20, 35.90) | 0.059 |
| Hb,(g/dL) | 10.00 (8.40, 11.90) | 10.15 (8.60, 12.00) | 9.90 (8.30, 11.80) | 0.081 |
| PLT(103/μL) | 215.00(157.00,282.50) | 216.00(155.25,279.75) | 215.00(157.00,284.00) | 0.882 |
| pH | 7.27 (7.18, 7.33) | 7.27 (7.18, 7.33) | 7.27 (7.18, 7.33) | 0.962 |
| PO2,(mmHg) | 104.00(98.00,110.00) | 103.00(100.00,109.00) | 102.00(100.00,105.00) | 0.653 |
| PCO2,(mmHg) | 33.00 (29.00, 38.00) | 33.00 (29.00, 38.00) | 33.00 (29.00, 38.00) | 0.725 |
| Aniongap,(mmol/L) | 18.00 (15.00, 23.00) | 19.00 (16.00, 22.00) | 18.00 (15.00, 23.00) | 0.951 |
| Lactate,(mmol/L) | 3.17 (2.24, 5.50) | 3.12 (2.21, 5.77) | 3.18 (2.25, 5.50) | 0.705 |
| BicarbonTate,(mmol/L) | 23.00 (20.00, 26.00) | 23.00 (20.25, 26.00) | 23.00 (20.00, 26.00) | 0.992 |
| Albumin,(g/dL) | 3.10 (2.90, 3.28) | 3.11 (2.97, 3.25) | 3.10 (2.90, 3.30) | 0.522 |
| ALT,(U/L) | 52.34 (30.00, 109.00) | 51.40 (31.00, 101.75) | 52.60 (30.00, 109.00) | 0.609 |
| AST,(U/L) | 110.00 (56.00, 241.50) | 110.00 (59.25, 268.25) | 110.00 (56.00, 233.00) | 0.788 |
| ALP,(U/L) | 8.63 (7.20, 11.95) | 8.64 (6.93, 12.07) | 8.62 (7.20, 11.90) | 0.934 |
| Na+,(mmol/L) | 140.00(138.00,143.00) | 141.00(138.00,143.00) | 140.00(138.00,143.00) | 0.960 |
| K+,(mmol/L) | 4.70 (4.30, 5.40) | 4.70 (4.30, 5.30) | 4.70 (4.30, 5.40) | 0.693 |
| BUN,(mg/dL) | 29.00 (20.00, 46.00) | 28.50 (20.00, 44.00) | 29.00 (20.00, 47.00) | 0.418 |
| Creatinine(mg/dL) | 1.50 (1.00, 2.50) | 1.50 (1.00, 2.40) | 1.50 (1.00, 2.50) | 0.357 |
| TBil(μmol/L) | 0.69 (0.50, 1.10) | 0.70 (0.50, 1.17) | 0.69 (0.50, 1.10) | 0.193 |
| Ck-MB(U/L) | 292.87(170.50,359.86) | 294.00(164.25,356.30) | 292.48(173.00,360.13) | 0.807 |
| Ck-CPK(IU/L) | 292.87(170.50,359.86) | 294.00(164.25,356.30) | 292.48(173.00,360.13) | 0.807 |
| LDH(U/L) | 396.65(365.86,486.00) | 393.42(357.37,468.95) | 398.86(369.25,490.00) | 0.126 |
| Glucose,(mmol/L) | 108.00 (88.00, 136.00) | 109.00 (90.00, 138.00) | 108.00 (87.00, 136.00) | 0.666 |
| Fibrinogen,(mg/dL) | 254.36(241.82,287.17) | 255.22(242.59,283.90) | 254.23(241.82,288.01) | 0.803 |
| PT,(S) | 15.40 (13.50, 20.20) | 15.40 (13.30, 19.90) | 15.40 (13.60, 20.60) | 0.196 |
| PTT,(S) | 40.30 (31.10, 77.30) | 40.80 (31.33, 85.52) | 40.10 (30.90, 72.60) | 0.411 |
| INR | 40.30 (31.10, 77.30) | 40.80 (31.33, 85.52) | 40.10 (30.90, 72.60) | 0.411 |
| **Critical assessment on admission, Median (Q1, Q3)** | | | | |
| APS Ⅲ | 67.00 (48.00, 92.00) | 64.50 (48.00, 93.00) | 68.00 (48.00, 92.00) | 0.921 |
| SOFA | 9.00 (6.00, 12.00) | 9.00 (5.00, 12.00) | 9.00 (6.00, 12.00) | 0.853 |
| GCS | 13.00 (6.00, 15.00) | 12.00 (5.00, 14.75) | 13.00 (7.00, 15.00) | 0.142 |
| **Comorbidity, n (%)** | | | | |
| CCI | 6.00 (4.00, 8.00) | 6.00 (4.00, 8.00) | 6.00 (4.00, 8.00) | 0.966 |
| MI | 429 (29.98) | 121 (28.14) | 308 (30.77) | 0.320 |
| CHD | 823 (57.51) | 251 (58.37) | 572 (57.14) | 0.666 |
| CBD | 214 (14.95) | 63 (14.65) | 151 (15.08) | 0.833 |
| CPD | 408 (28.51) | 116 (26.98) | 292 (29.17) | 0.399 |
| Diabeteswithcc | 201 (14.05) | 60 (13.95) | 141 (14.09) | 0.947 |
| RenTaldisease | 424 (29.63) | 133 (30.93) | 291 (29.07) | 0.480 |
| Malignancy | 148 (10.34) | 40 (9.30) | 108 (10.79) | 0.959 |
| SevereLiverDisease | 62(4.33) | 22(5.12) | 40(4.00) | 0.340 |
| MetastaticSolidTumor | 56(3.91) | 19(4.42) | 37(3.70) | 0.518 |
| **Advanced life support,n(%)** | | | | |
| RR | 152(10.62) | 54(12.59) | 119(11.89) | 0.725 |
| IMV | 774(54.09) | 225(52.32) | 528(52.75) | 0.884 |
| Vasoactive_agent | 749(52.34) | 237(55.12) | 546(54.55) | 0.843 |
| Antibiotic | 990(69.18) | 298(69.30) | 719(71.83) | 0.697 |
| **Length of Stay (LOS), Median (Q1, Q3)** | | | | |
| Los of Hospital (day) | 9.13 (4.48, 17.69) | 9.11 (4.29, 17.08) | 9.13 (4.61, 17.86) | 0.502 |
| Los of ICU (day) | 4.16 (2.08, 8.48) | 4.40 (2.10, 8.64) | 4.10 (2.07, 8.44) | 0.722 |

**Table S3. LASSO regression variable selection process.**

| Name | Minimum mean square error coefficient | Minimum distance standard error coefficient |
| --- | --- | --- |
| (Intercept) | -28.716 | -12.968 |
| Gender | -0.159 | -0.037 |
| MI | 0.0 | 0.0 |
| CHF | 0.612 | 0.427 |
| CBD | 0.387 | 0.245 |
| CPD | 0.274 | 0.101 |
| Diabetes_with_cc | -0.546 | -0.358 |
| Renal_disease | -0.097 | -0.014 |
| Malignant_cancer | 0.157 | 0.061 |
| Severe_liver_disease | 0.56 | 0.283 |
| Metastatic_solid_tumor | 1.216 | 1.034 |
| APSⅢ | 0.035 | 0.022 |
| SOFA | 0.0 | 0.0 |
| Age | 0.016 | 0.012 |
| CCI | 0.0 | 0.0 |
| Lactate | 0.134 | 0.085 |
| pH | 2.694 | 0.841 |
| SO2 | 0.0 | 0.0 |
| PO2 | 0.0 | -0.001 |
| PCO2 | 0.013 | 0.001 |
| TotalCO2 | 0.0 | 0.0 |
| Hct | 0.067 | 0.016 |
| Hb | -0.118 | 0.0 |
| PLT | 0.001 | 0.001 |
| WBC | 0.007 | 0.008 |
| Albumin | -0.111 | -0.045 |
| AG | 0.014 | 0.016 |
| Bicarbonate | -0.106 | -0.054 |
| BUN | 0.001 | 0.0 |
| Calcium | 0.031 | 0.0 |
| Chloride | -0.038 | 0.0 |
| Cr | -0.073 | -0.002 |
| Sodium | 0.083 | 0.039 |
| Potassium | -0.007 | 0.0 |
| Fibrinogen | 0.0 | 0.0 |
| INR | 0.0 | 0.0 |
| PT | 0.007 | 0.005 |
| PTT | 0.0 | 0.0 |
| ALT | 0.0 | 0.0 |
| ALP | 0.022 | 0.018 |
| AST | 0.0 | 0.0 |
| Amylase | 0.001 | 0.0 |
| Bilirubin_total | -0.024 | 0.0 |
| CK-CPK | 0.0 | 0.0 |
| Ck-MB | 0.001 | 0.0 |
| LDH | 0.0 | 0.0 |
| HR | -0.002 | 0.0 |
| SBP | 0.0 | 0.0 |
| DBP | -0.004 | 0.0 |
| MBP | 0.009 | 0.0 |
| RR | 0.005 | 0.007 |
| Temperature | -0.134 | -0.117 |
| SpO2 | -0.019 | -0.002 |
| Glucose | 0.004 | 0.004 |
| Gcs_min | 0.074 | 0.021 |

The Lasso regression model was established using the binomial distribution. The coefficient table, coefficient profile plot, and cross-validation curve of the Lasso regression are presented in [Lasso Coefficient Table], [Coefficient Profile Plot, **Fig.1.**], and [Lasso Regression Cross-Validation Curve, **Fig.2.**], respectively.The λ value corresponding to the Minimum Mean Squared Error (MMSE) was 0.003, with selected variables including:

Gender + CHD + CBD + CPD + Diabetes_with_CC + Renal_disease + Malignant_cancer + Severe_liver_disease + Metastatic_solid_tumor + APS Ⅲ + Age + Lactate + pH + PO2 + PCO2 + Hct + Hb + PLT + WBC + Albumin + AG + Bicarbonate + BUN + Calcium + Chloride + Cr + Sodium + Potassium + PT + ALT + ALP + AST + Amylase + Bilirubin_total + CK-MB + HR + DBP + MBP + RR + Temperature + SpO2 + Glucose + GCS_min**(n=43).**

The λ value for the Minimum Distance Standard Error was 0.012, with selected variables: Gender+CHF+CBD+CPD+Diabetes_with_cc+Renal_disease+Malignant_cancer+Severe_liver_disease+Metastatic_solid_tumor+APSⅢ+Age+Lactate+pH+PO2+PCO2+Hct+PLT+WBC+Albumin+AG+Bicarbonate+Cr+Sodium+PT+ALP+AST+Amylase+Ck-mb+RR+Temperature+SpO2+Glucose+Gcs_min**(n=34)**.

The analysis was performed using R version 4.2.3 with the glmnet package (version 4.1.8).


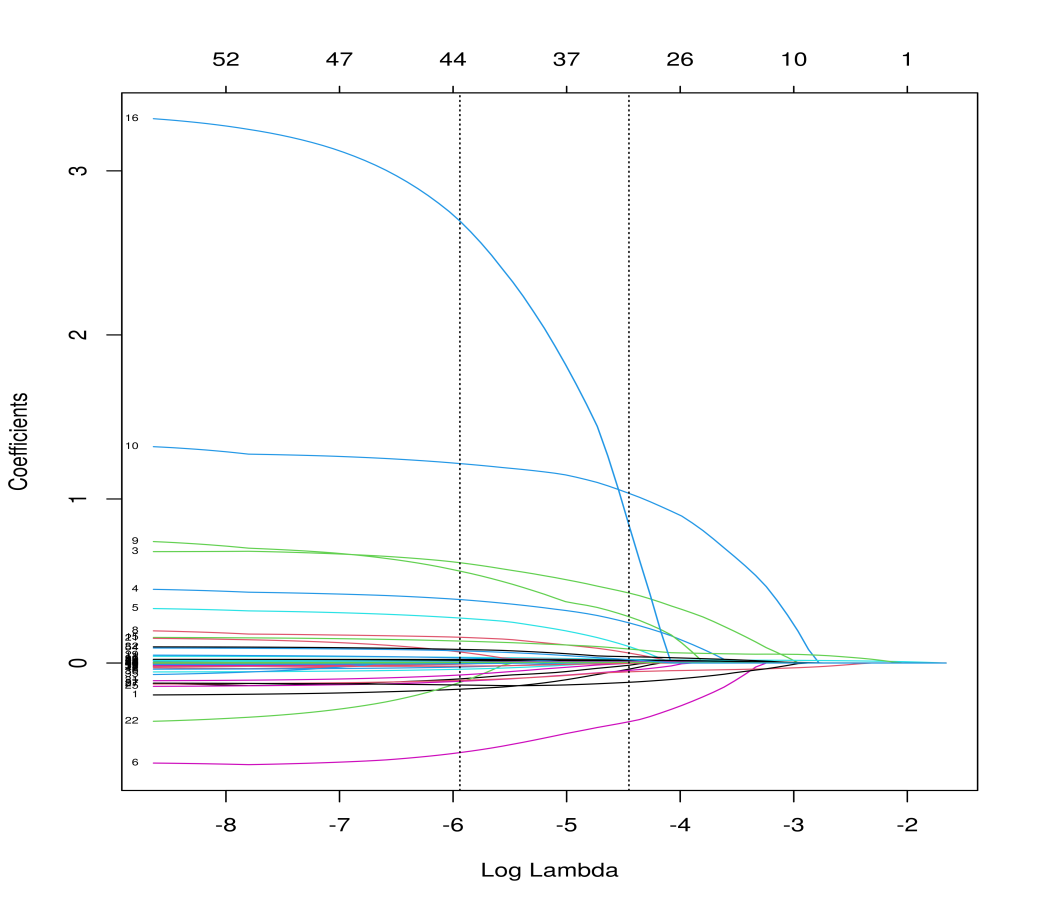


**Fig. S1. Coefficient profile plot of the LASSO regression model, showing the shrinkage paths of coefficients as the penalty parameter λ changes.**


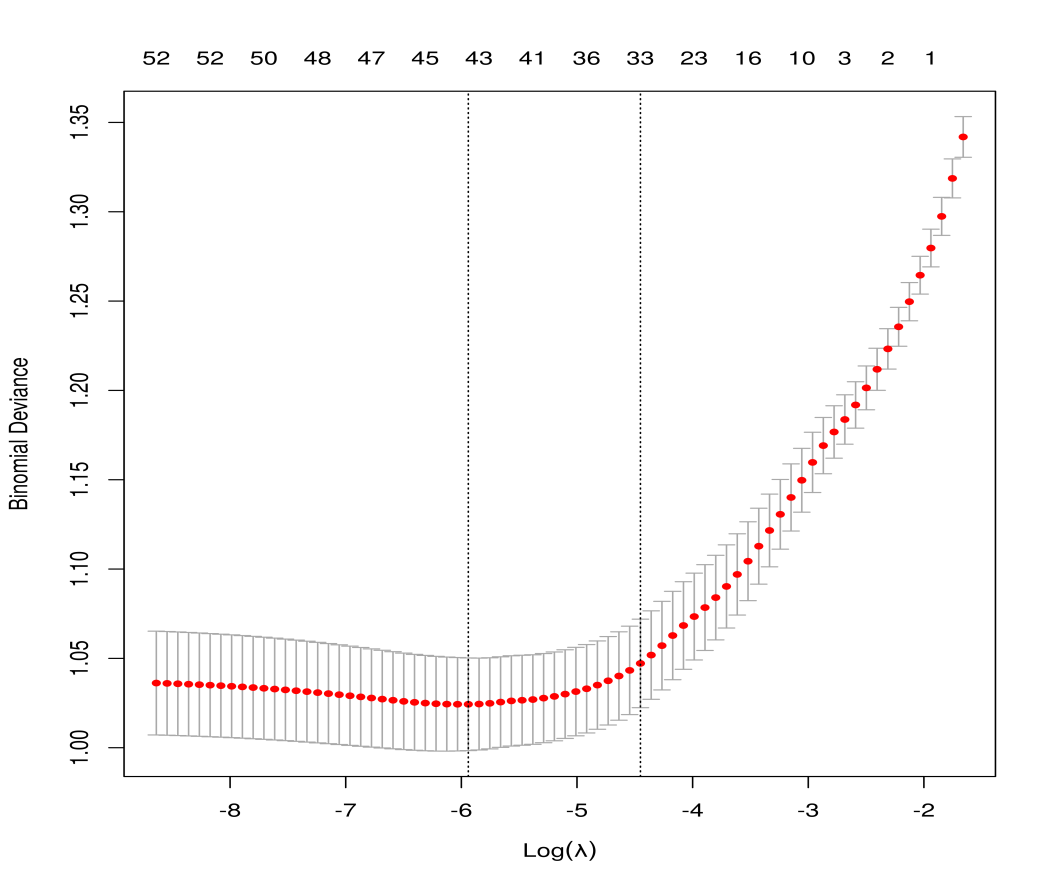


**Fig. S2. Cross-validation curve for LASSO regression, indicating the minimum mean squared error (MMSE) and the λ value selected for optimal variable retention.**


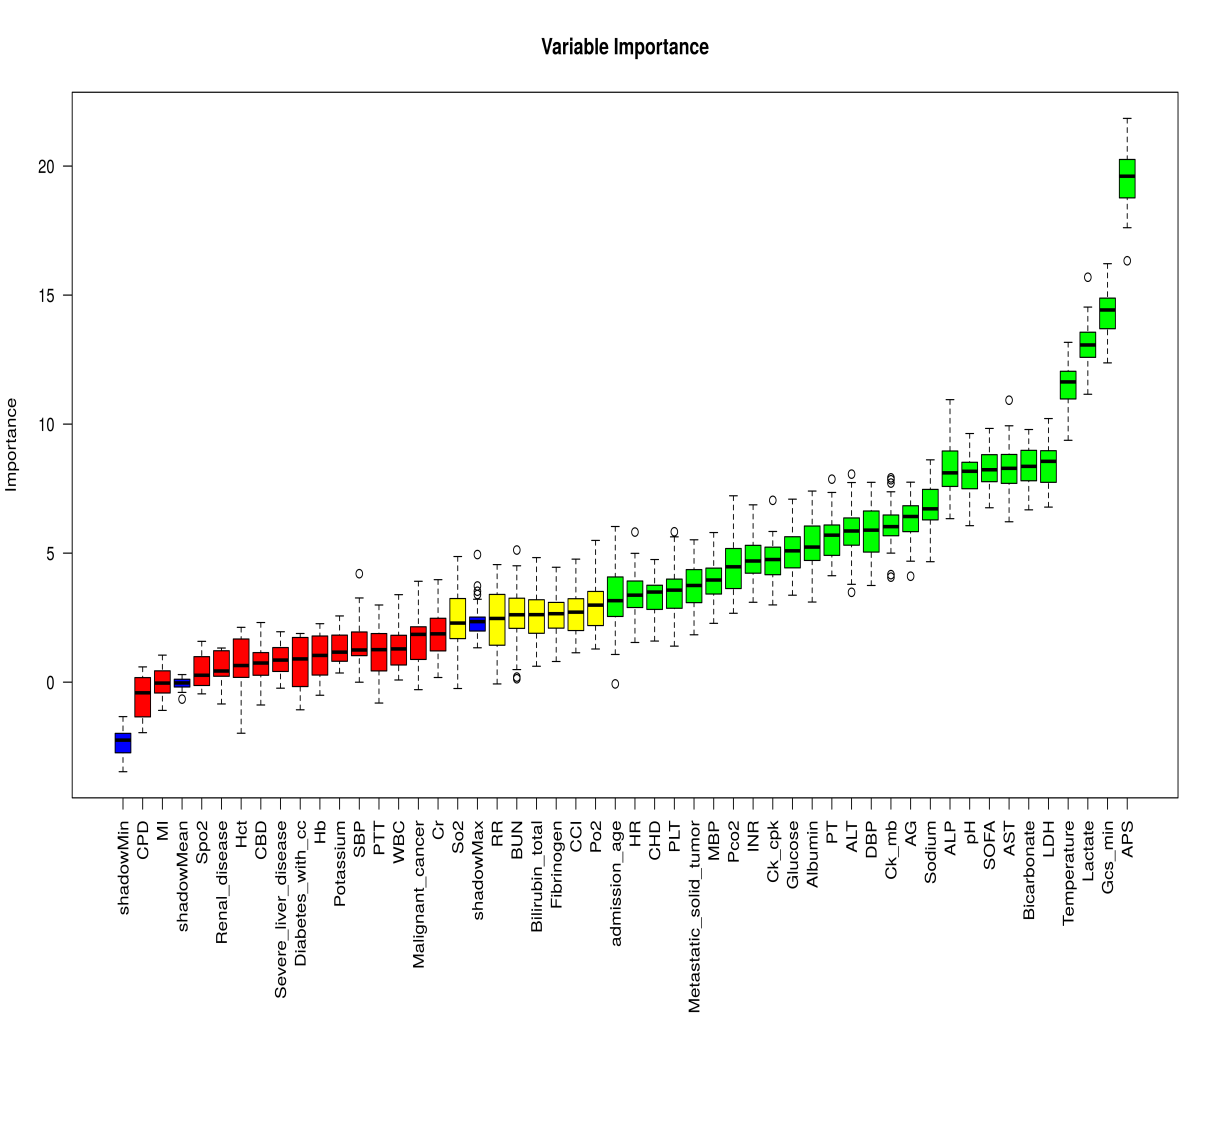


**Fig. S3. Flow diagram of variable selection using the Boruta method, classifying predictors as confirmed, rejected, or tentative based on feature importance and stability across methods.**

**Confirmed Variables (Green, n=27):**SOFA, APS, Admission_age, CHF, Metastatic_solid_tumor, Lactate, pH, PCO₂, PLT, Albumin, AG, Bicarbonate, Sodium, INR, PT, ALT, ALP, AST,
Ck-CPK, Ck-MB, LDH, HR, DBP, MBP, Temperature, Glucose, Gcs_min.

**Rejected Variables (Red, n=15):**MI, CBD, CPD, Diabetes_with_cc, Renal_disease, Malignant_cancer, Severe_liver_disease, Hct, Hb, WBC, Cr, Potassium, PTT, SBP, SpO₂.

**Tentative Variables (Yellow, n=7):**CCI, SO₂, PO₂, BUN, Fibrinogen, Bilirubin_total, RR.

Shadow Variables (Blue, n=0).


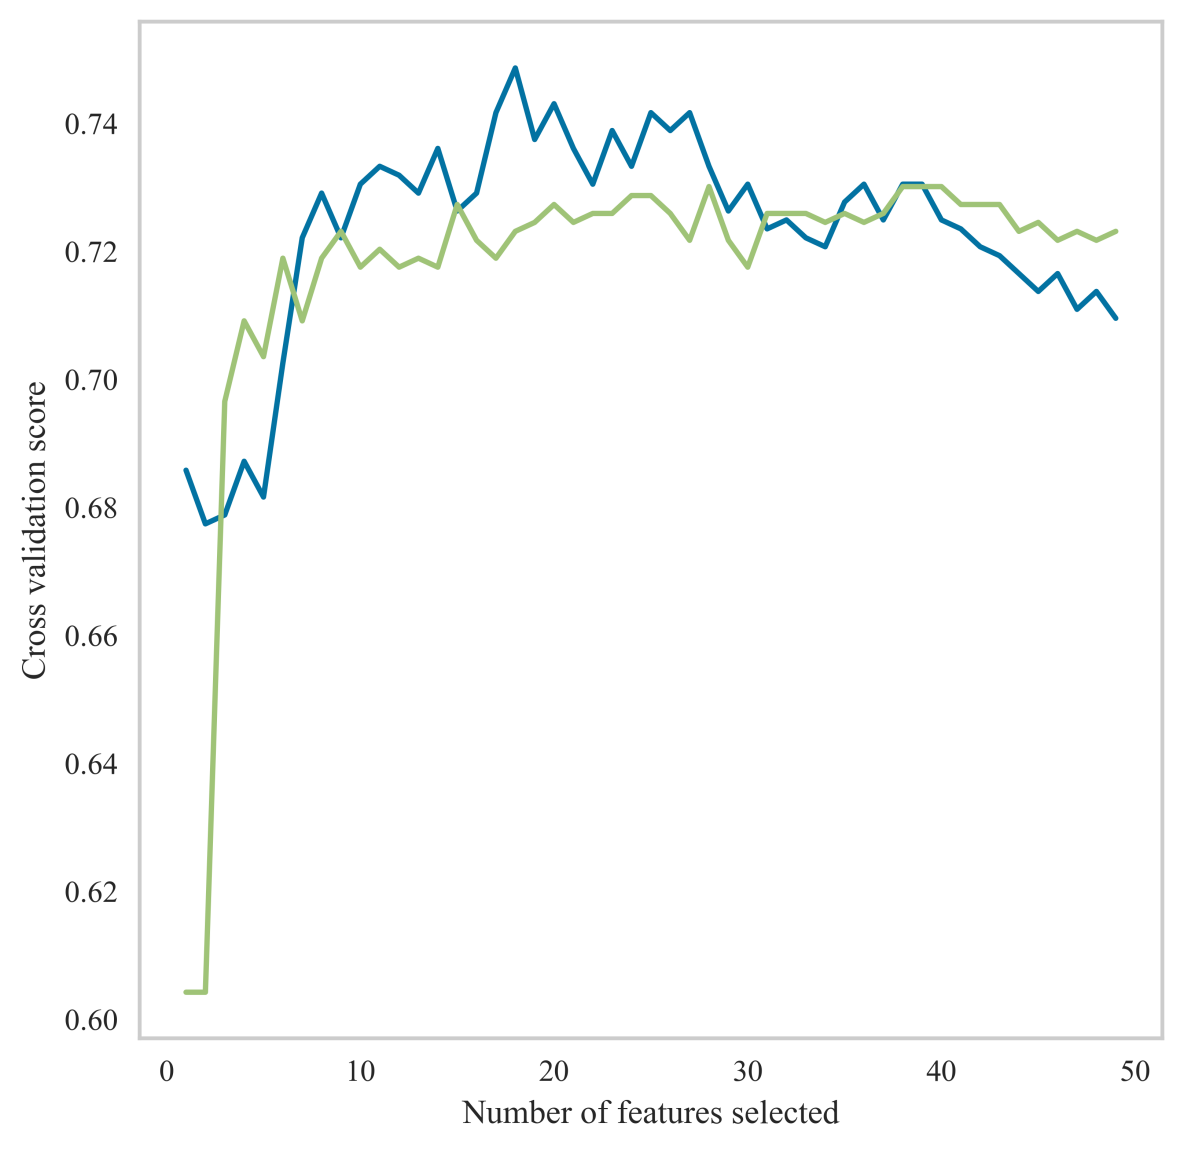


****Fig. S4.** Support Vector Machine–Recursive Feature Elimination with Cross-Validation (SVM-RFECV) results, retaining 18 key predictors most strongly associated with in-hospital mortality.**

18 factors were selected by the SVMREFCV method, including: APSⅢ，Age，CHF，Diabetes_with_cc，Metastatic_solid_tumor，Lactate，pH，Hct，Hb，AG，Bicarbonate，Cr，Sodium，ALT，ALP，AST，Glucose，Gcs_min


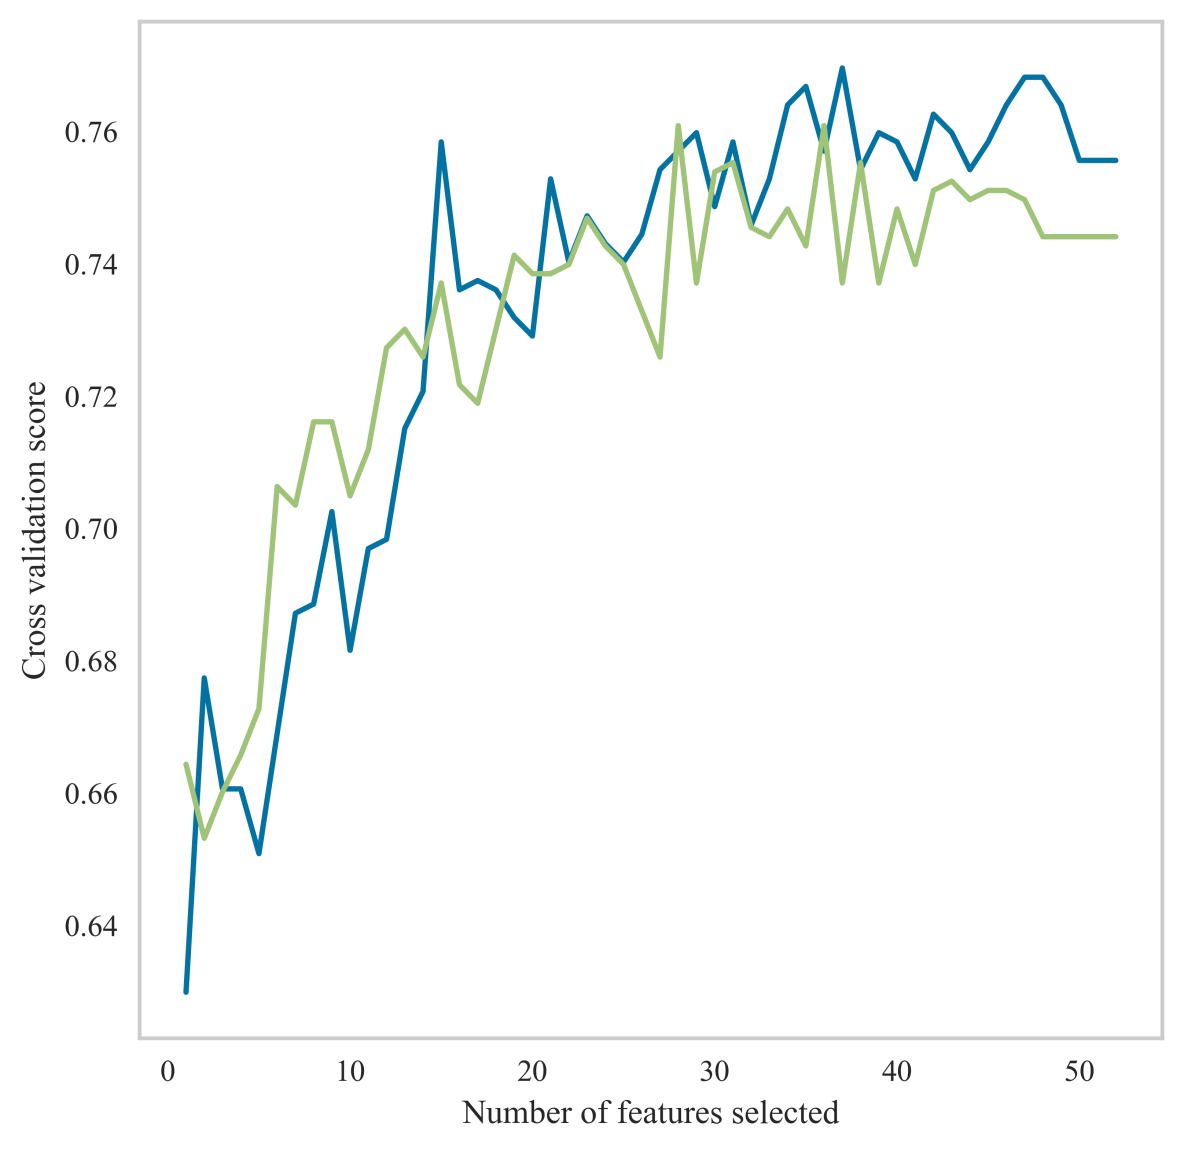


**Fig. S5. Recursive Feature Elimination with Cross-Validation (RFECV) results, identifying 28 variables contributing significantly to model discrimination.**

28 factors were selected by the REFCV method, including:APSⅢ，SOFA，Age，CHF，CBD，Diabetes_with_cc，Renal_disease，CCI，Lactate，pH，TotalCO2，PLT，Bicarbonate，Cr，Sodium，PT，ALT，ALP，AST，Bilirubin_total，CK-CPK，CK-MB，LDH，DBP，MBP，Temperature，Glucose，Gcs_min

**
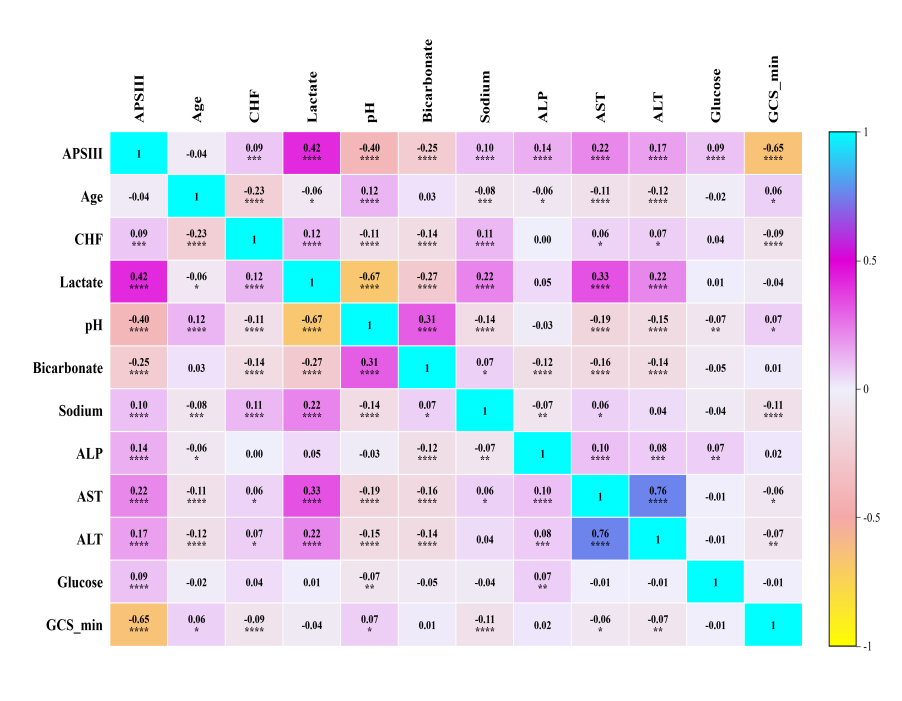
**

**Fig.S6**

**Fig. S6. Correlation heatmap of candidate predictors, demonstrating covariance structures and highlighting potential collinearity (e.g., sodium vs. chloride, pH vs. bicarbonate).**

**Table S4. Hyperparameters and selected settings for each algorithm.**

| **Classifier** | **Model Parameters** |
| --- | --- |
| **XGBoost** | objective (optimization function): binary:logistic; colsample_bytree (feature subsampling rate): 1; learning_rate (learning rate): 0.1; max_depth (maximum tree depth): 4; min_child_weight (min instance weight sum for child node): 2; n_estimators (number of base learners): 20; reg_lambda (L2 regularization coefficient): 0.5; subsample (row subsampling rate): 1 |
| **Logistic** | C (regularization factor): 0.1; l1_ratio (ElasticNet mixing parameter): None; max_iter (number of iterations): 50; penalty (regularization type): l2; solver (algorithm): lbfgs; tol (convergence tolerance): 1e-06 |
| **LGBM** | boosting_type (algorithm type): dart; learning_rate: 0.001; max_depth (maximum tree depth): 1; n_estimators (number of trees): 5; num_leaves (maximum leaves): 100 |
| **AdaBoost** | learning_rate: 0.3; n_estimators (number of weak learners): 50 |
| **RandomForest** | criterion (splitting criterion): gini; max_depth (maximum tree depth): None; max_features (max features for splitting): sqrt; min_impurity_decrease (minimum impurity decrease for split): 0.0; min_samples_leaf (min samples at leaf node): 1; min_samples_split (min samples for internal node split): 2; n_estimators (number of trees): 100 |
| **DecisionTree** | criterion (splitting criterion): entropy; max_depth (maximum tree depth): 20; min_samples_leaf (min samples at leaf node): 1; min_samples_split (min samples for internal node split): 50 |
| **MLP** | activation (nonlinearity): logistic; alpha (L2 regularization): 0.0001; batch_size: auto; hidden_layer_sizes (width): (30, 30); learning_rate (schedule): constant; learning_rate_init (initial LR): 0.001; max_iter: 20; solver: adam; tol (convergence tolerance): 0.0001 |
| **GNB** | priors (prior probabilities): None; var_smoothing (variance smoothing): 1e-07 |
| **KNN** | algorithm (nearest neighbor algorithm): auto; leaf_size: 10; n_neighbors (number of neighbors): 2; p (distance metric, p=2 for Euclidean): 2; weights (weighting type): uniform |

Note: Parameter names are followed by brief explanations in parentheses; values shown are the selected settings for this study.

**Table S5. Multi-model classification — Summary of Training set results.**

| **Model** | **AUC** | **Cut-off** | **Accuracy** | **Sensitivity** | **Specificity** | **PPV** | **NPV** | **F1 score** | **Kappa score** |
| --- | --- | --- | --- | --- | --- | --- | --- | --- | --- |
| **XGBoost** | 0.91 | 0.43 | 0.83 | 0.79 | 0.85 | 0.78 | 0.86 | 0.78 | 0.64 |
| **LR** | 0.8 | 0.38 | 0.73 | 0.72 | 0.73 | 0.64 | 0.8 | 0.68 | 0.44 |
| **LGBM** | 0.68 | 0.4 | 0.68 | 0.66 | 0.69 | 0.59 | 0.76 | 0.62 | 0.35 |
| **Ada** | 0.85 | 0.5 | 0.77 | 0.72 | 0.8 | 0.71 | 0.82 | 0.71 | 0.52 |
| **DT** | 0.89 | 0.42 | 0.79 | 0.82 | 0.78 | 0.71 | 0.87 | 0.76 | 0.58 |
| **MLP** | 0.77 | 0.38 | 0.70 | 0.76 | 0.66 | 0.59 | 0.81 | 0.67 | 0.40 |
| **RF** | 1 | 0.59 | 0.98 | 0.95 | 0.99 | 0.99 | 0.97 | 0.97 | 0.95 |
| **GNB** | 0.78 | 0.16 | 0.72 | 0.71 | 0.73 | 0.63 | 0.79 | 0.67 | 0.43 |
| **KNN** | 0.91 | 0.50 | 0.81 | 0.97 | 0.71 | 0.69 | 0.97 | 0.80 | 0.64 |

**Table S6. Multi-model classification — Summary of Validation set results.**

| **Model** | **AUC** | **Cut-off** | **Accuracy** | **Sensitivity** | **Specificity** | **PPV** | **NPV** | **F1 score** | **Kappa score** |
| --- | --- | --- | --- | --- | --- | --- | --- | --- | --- |
| **XGBoost** | 0.81 | 0.43 | 0.74 | 0.69 | 0.78 | 0.67 | 0.79 | 0.68 | 0.47 |
| **LR** | 0.80 | 0.38 | 0.72 | 0.71 | 0.72 | 0.63 | 0.79 | 0.66 | 0.42 |
| **LGBM** | 0.67 | 0.40 | 0.67 | 0.66 | 0.68 | 0.57 | 0.75 | 0.61 | 0.33 |
| **Ada** | 0.81 | 0.50 | 0.74 | 0.69 | 0.78 | 0.67 | 0.79 | 0.67 | 0.46 |
| **DT** | 0.76 | 0.42 | 0.69 | 0.71 | 0.67 | 0.59 | 0.78 | 0.64 | 0.37 |
| **MLP** | 0.77 | 0.38 | 0.69 | 0.74 | 0.66 | 0.58 | 0.79 | 0.65 | 0.38 |
| **RF** | 0.83 | 0.59 | 0.75 | 0.49 | 0.92 | 0.81 | 0.73 | 0.61 | 0.44 |
| **GNB** | 0.78 | 0.16 | 0.71 | 0.70 | 0.72 | 0.62 | 0.79 | 0.66 | 0.41 |
| **KNN** | 0.66 | 0.50 | 0.62 | 0.69 | 0.57 | 0.52 | 0.74 | 0.59 | 0.25 |

**Table S7. Z-value averages for DeLong test across models.**

| **Model** | **XGBoost** | **LR** | **LGBM** | **Ada** | **DT** | **MLP** | **RF** | **GNB** | **KNN** |
| --- | --- | --- | --- | --- | --- | --- | --- | --- | --- |
| **XGBoost** | NA | 0.0 | 0.0 | 0.0 | 0.0 | 0.0 | 0.0 | 0.0 | 0.0 |
| **LR** | 0.0 | NA | 0.0 | 0.0 | 0.0 | 0.0 | 0.0 | 0.0 | 0.0 |
| **LGBM** | 0.0 | 0.0 | NA | 0.0 | 0.0 | 0.0 | 0.0 | 0.0 | 0.0 |
| **Ada** | 0.0 | 0.0 | 0.0 | NA | 0.0 | 0.0 | 0.0 | 0.0 | 0.0 |
| **DT** | 0.0 | 0.0 | 0.0 | 0.0 | NA | 0.0 | 0.0 | 0.0 | 0.0 |
| **MLP** | 0.0 | 0.0 | 0.0 | 0.0 | 0.0 | NA | 0.0 | 0.0 | 0.0 |
| **RF** | 0.0 | 0.0 | 0.0 | 0.0 | 0.0 | 0.0 | NA | 0.0 | 0.0 |
| **GNB** | 0.0 | 0.0 | 0.0 | 0.0 | 0.0 | 0.0 | 0.0 | NA | 0.0 |
| **KNN** | 0.0 | 0.0 | 0.0 | 0.0 | 0.0 | 0.0 | 0.0 | 0.0 | NA |

**Table S8. P-value means for DeLong test across models.**

| Model | **XGBoost** | **LR** | **LGBM** | **Ada** | **DT** | **MLP** | **RF** | **GNB** | **KNN** |
| --- | --- | --- | --- | --- | --- | --- | --- | --- | --- |
| **XGBoost** | NA | 1.0 | 1.0 | 1.0 | 1.0 | 1.0 | 1.0 | 1.0 | 1.0 |
| **LR** | 1.0 | NA | 1.0 | 1.0 | 1.0 | 1.0 | 1.0 | 1.0 | 1.0 |
| **LGBM** | 1.0 | 1.0 | NA | 1.0 | 1.0 | 1.0 | 1.0 | 1.0 | 1.0 |
| **Ada** | 1.0 | 1.0 | 1.0 | NA | 1.0 | 1.0 | 1.0 | 1.0 | 1.0 |
| **DT** | 1.0 | 1.0 | 1.0 | 1.0 | NA | 1.0 | 1.0 | 1.0 | 1.0 |
| **MLP** | 1.0 | 1.0 | 1.0 | 1.0 | 1.0 | NA | 1.0 | 1.0 | 1.0 |
| **RF** | 1.0 | 1.0 | 1.0 | 1.0 | 1.0 | 1.0 | NA | 1.0 | 1.0 |
| **GNB** | 1.0 | 1.0 | 1.0 | 1.0 | 1.0 | 1.0 | 1.0 | NA | 1.0 |
| **KNN** | 1.0 | 1.0 | 1.0 | 1.0 | 1.0 | 1.0 | 1.0 | 1.0 | NA |


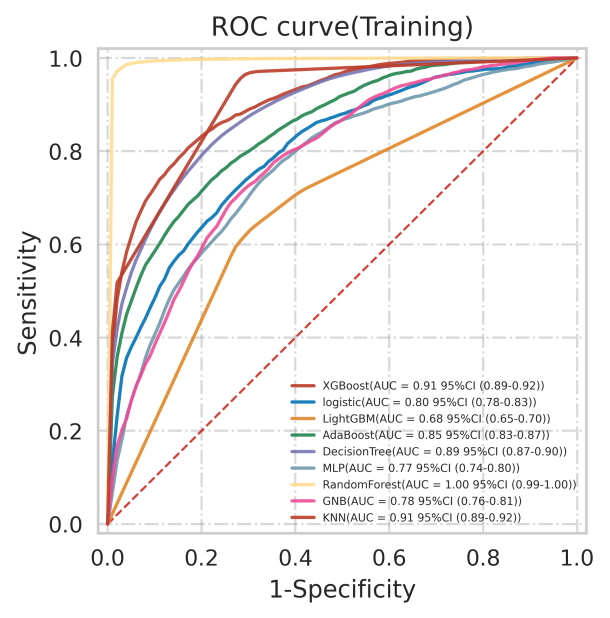


**Fig.S7**

**Fig. S7. Receiver operating characteristic (ROC) curves of nine machine learning models in the training cohort, with Random Forest (RF) achieving the highest AUC.**


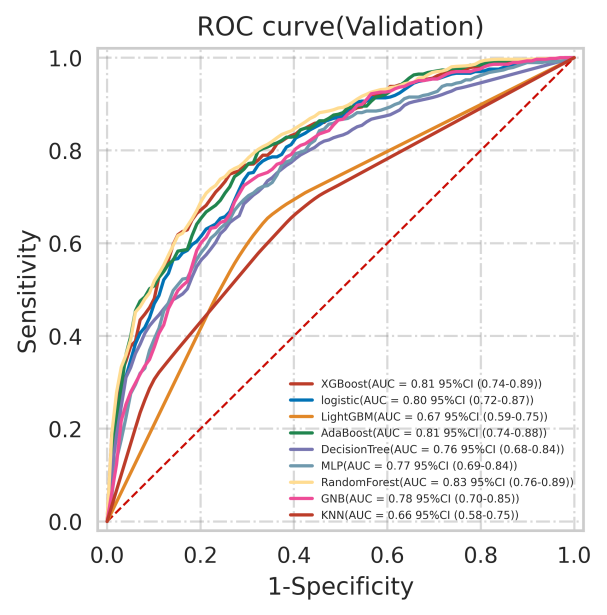


**Fig.S8**
**Fig. S8. ROC curves of nine machine learning models in the validation cohort, showing consistent superiority of the RF model over other algorithms.**


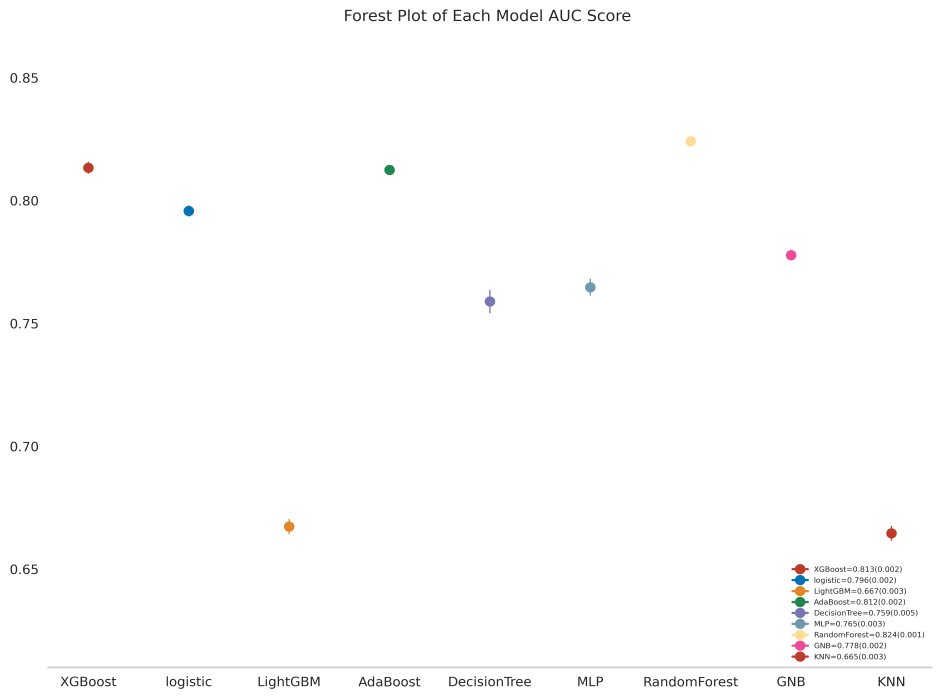


**Fig.S9**
**Fig. S9. Forest plot of AUC distributions for all candidate models, further confirming Random Forest as the best-performing classifier.**

**
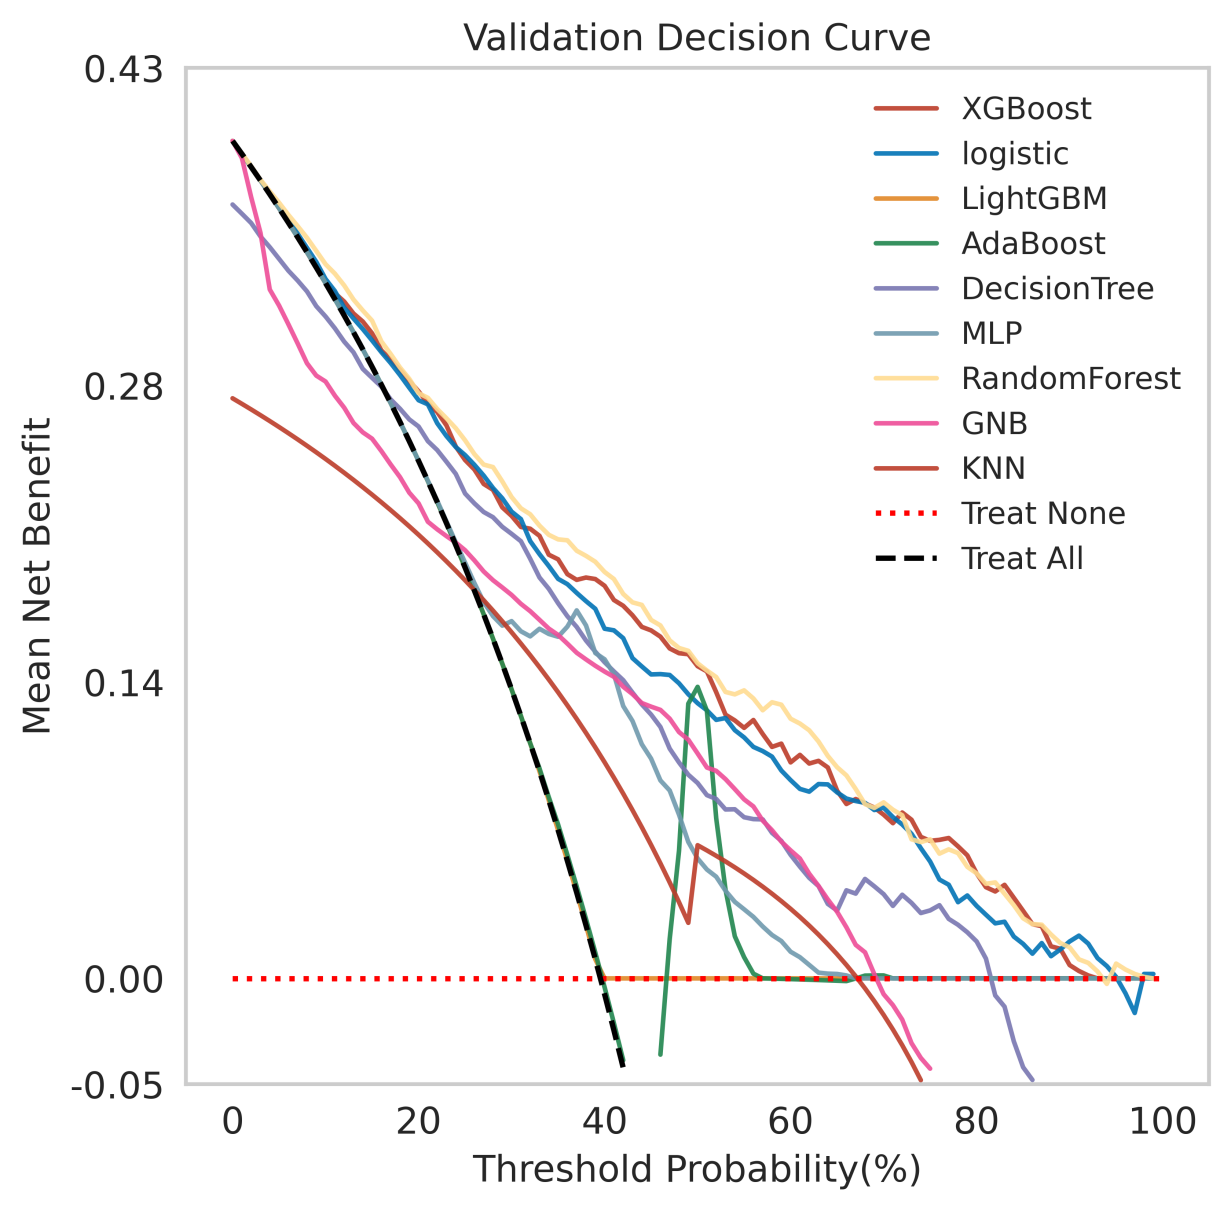
**

**Fig. S10. Decision curve analysis (DCA) of nine models in the validation cohort. RF exhibited the highest net clinical benefit across a broad range of threshold probabilities.**


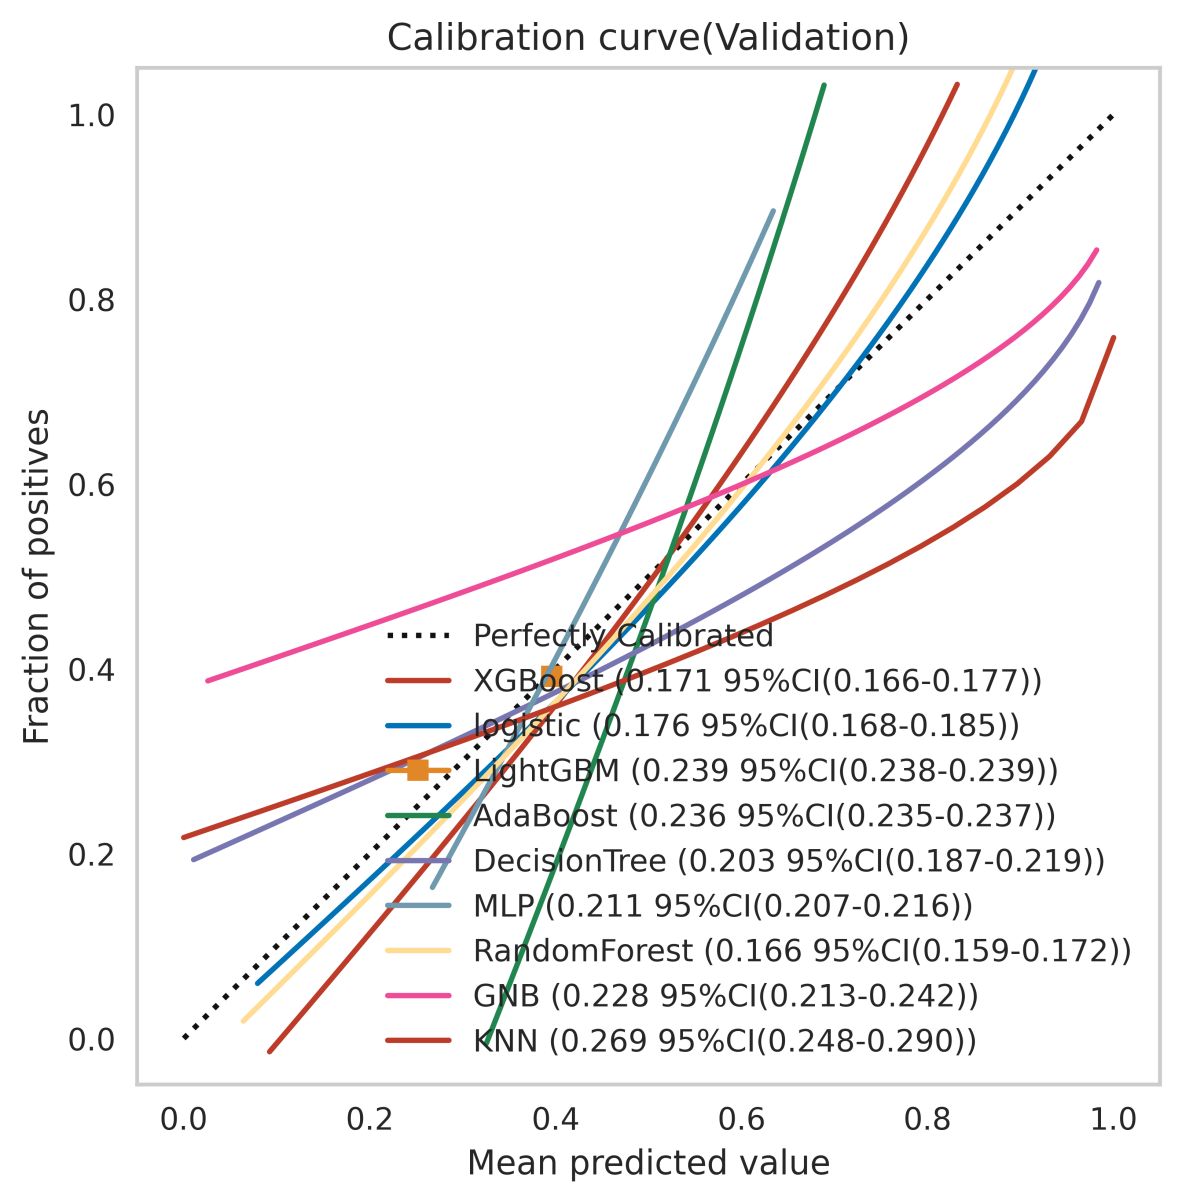


**Fig. S11. Calibration curves of machine learning models in the validation cohort. The RF model showed the closest alignment between predicted and observed outcomes, with a calibration error of 0.166 (95% CI: 0.159–0.172).**

**
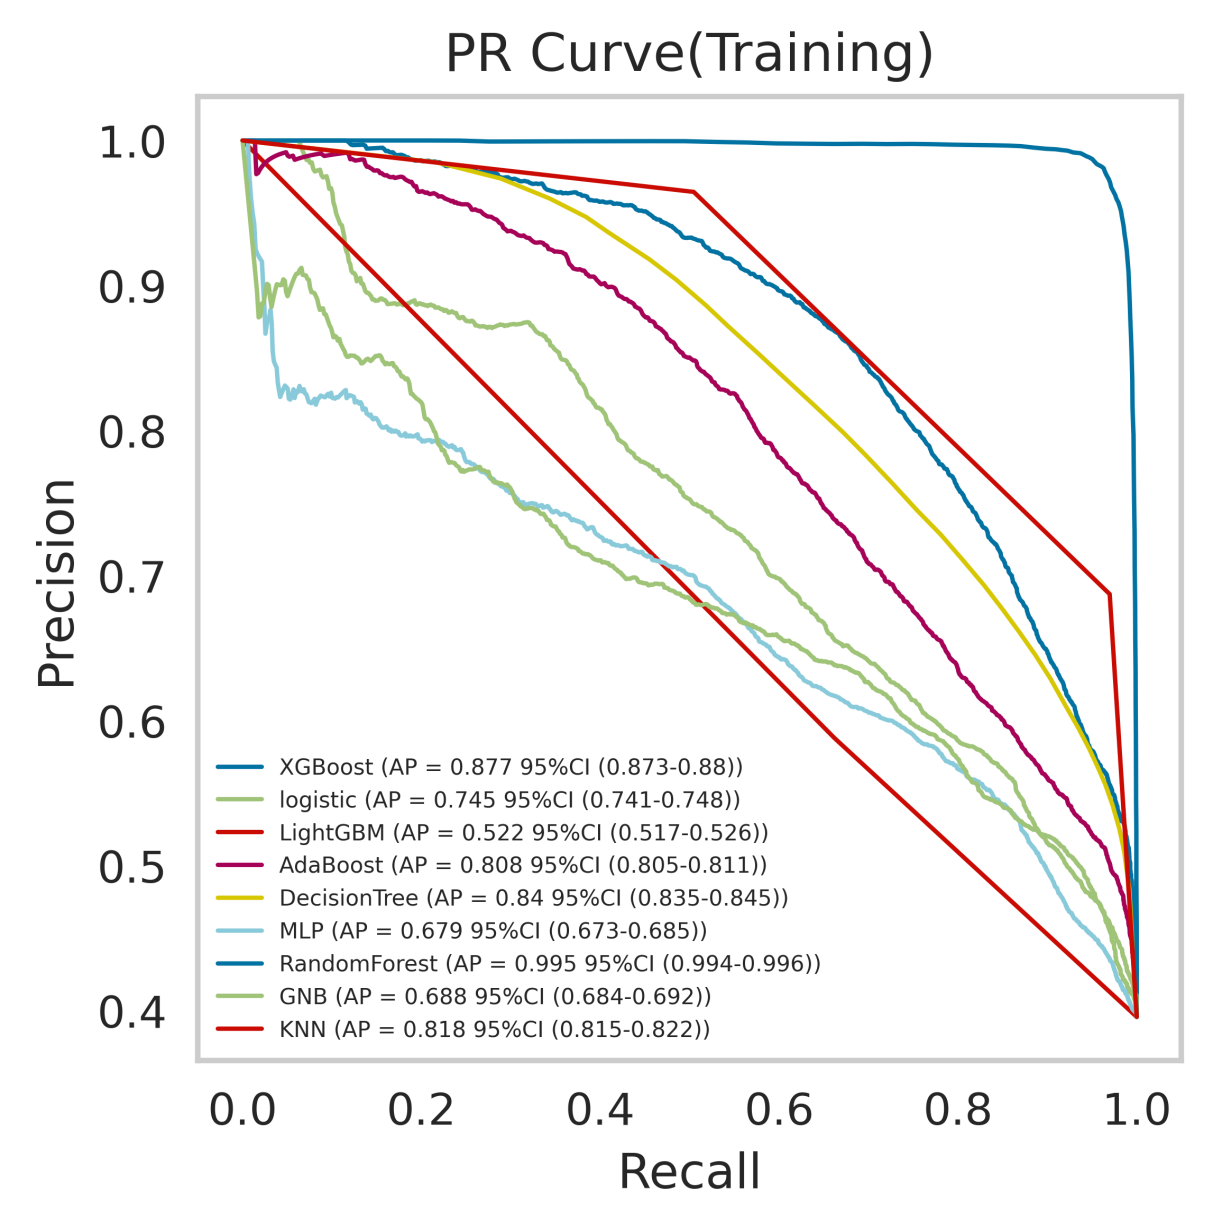
**

**Fig. S12. Precision–recall (PR) curves of nine models in the training cohort, with Random Forest demonstrating the highest average precision (AP = 0.995, 95% CI: 0.994–0.996).**

**
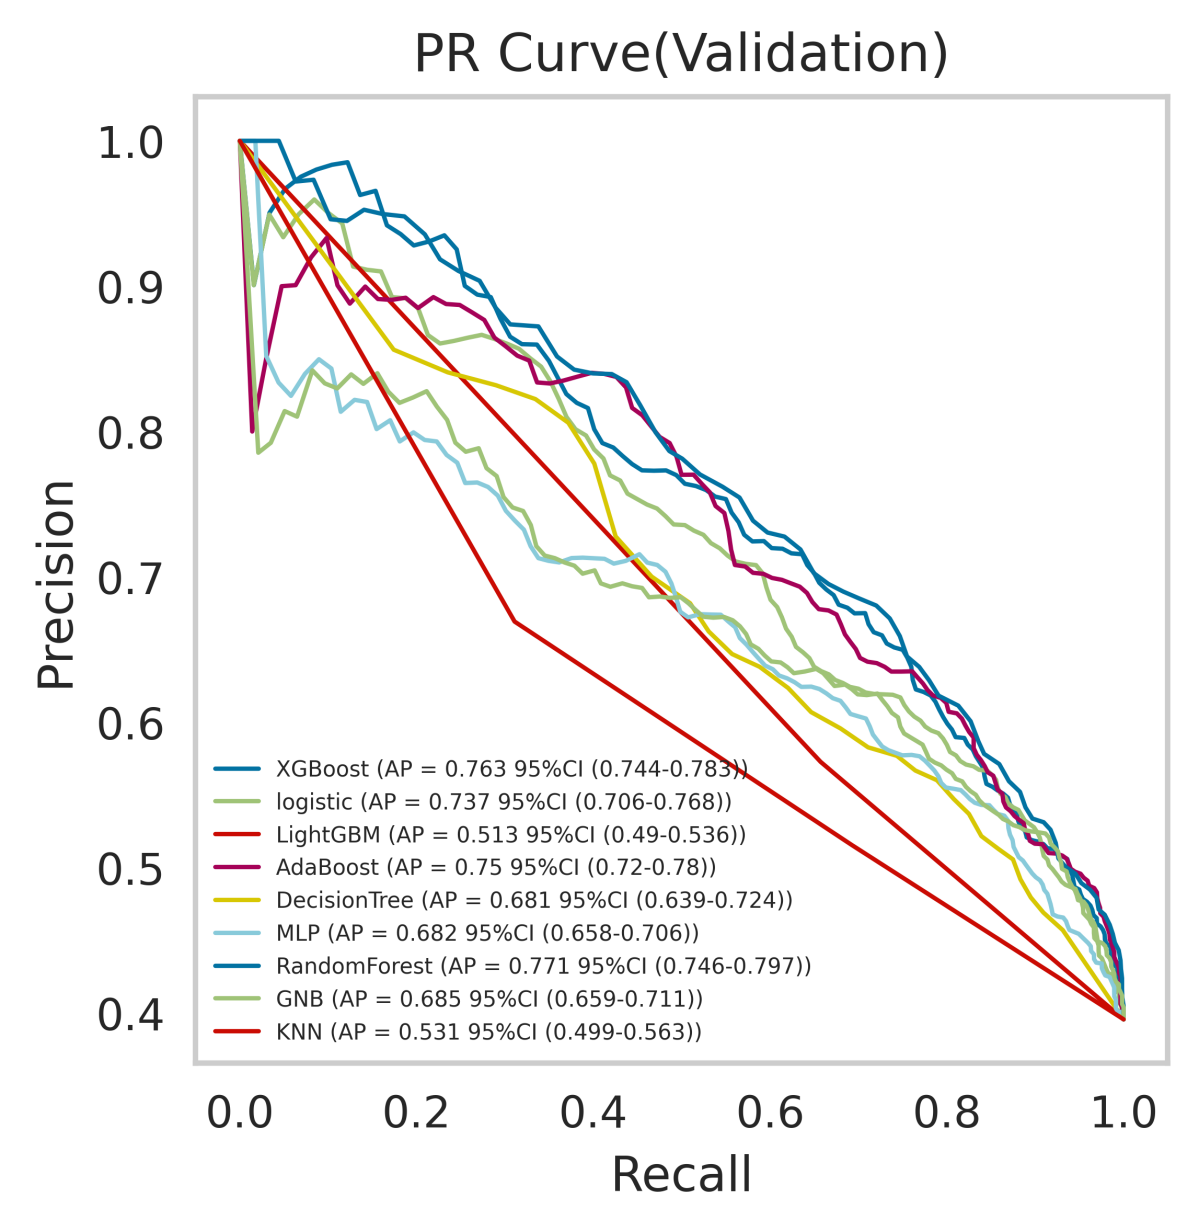
**

**Fig. S13. PR curves of nine models in the validation cohort, where the RF model maintained superior predictive ability (AP = 0.771, 95% CI: 0.746–0.797).**

**Table S9. Predictive performance of the random forest (RF) model for in-hospital mortality in SCA patients.**

| **Indications** | **Training(n=1001)** | **Vaditation(n=215)** | **Test (n=215)** |
| --- | --- | --- | --- |
| **AUC(95%CI)** | 0.87(0.85-0.89) | 0.80(0.78-0.84) | 0.84 (0.79-0.89) |
| **Cut-off(95%CI)** | 0.43(0.41-0.45) | 0.58(0.56-0.61) | 0.43 |
| **Accuracy(95%CI)** | 0.80(0.79-0.80) | 0.74(0.71-0.77) | 0.78 |
| **Sensitivity(95%CI)** | 0.76(0.73-0.78) | 0.50(0.42-0.57) | 0.72 |
| **Specificity(95%CI)** | 0.82(0.80-0.85) | 0.91(0.89-0.92) | 0.82 |
| **PPV(95%CI)** | 0.74(0.72-0.76) | 0.77(0.73-0.81) | 0.72 |
| **NPV(95%CI)** | 0.84(0.83-0.85) | 0.74(0.71-0.76) | 0.82 |
| **F1 score(95%CI)** | 0.75(0.74-0.75) | 0.60(0.54-0.66) | 0.72 |
| **Kappa Score(95%CI)** | 0.58(0.57-0.59) | 0.43(0.35-0.50) | 0.53 |

Performance metrics include AUC, optimal cut-off value, accuracy, sensitivity, specificity, positive predictive value (PPV), negative predictive value (NPV), F1-score, and kappa coefficient with corresponding 95% confidence intervals (CIs). Results are reported for the training, validation, and independent test cohorts.


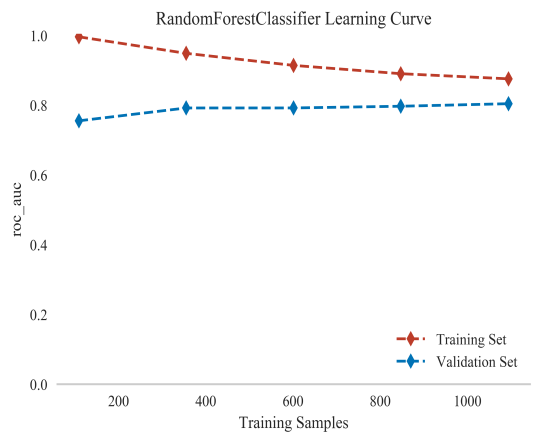


**Fig.S14**

**Fig. S14. Learning curves of the RF model. Training and validation performance converged smoothly with sample size expansion, excluding overfitting.**


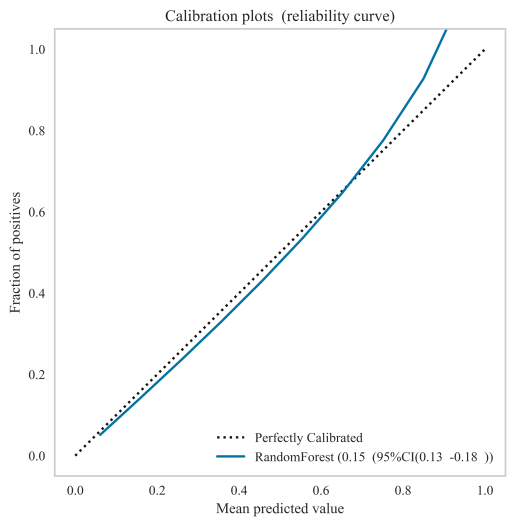


**Fig.S15**

**Fig. S15. Calibration plot of the RF model in the independent test cohort, confirming reliable probability estimation with a Brier score of 0.15 (95% CI: 0.13–0.18).**


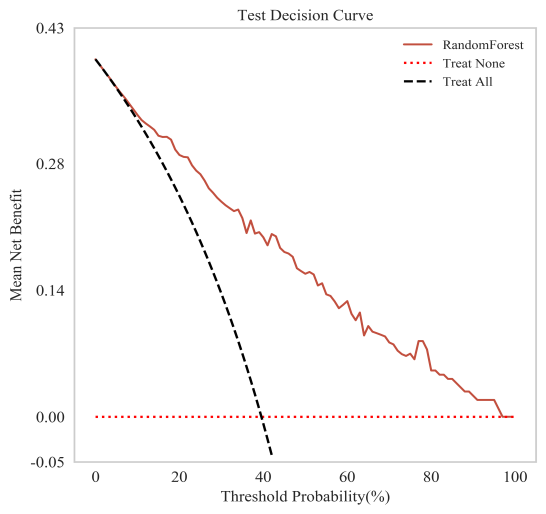


**Fig.S16.**

**Fig. S16. Decision curve analysis (DCA) in the test cohort, showing the RF model provided greater net clinical benefit compared with “Treat All” and “Treat None” strategies.**


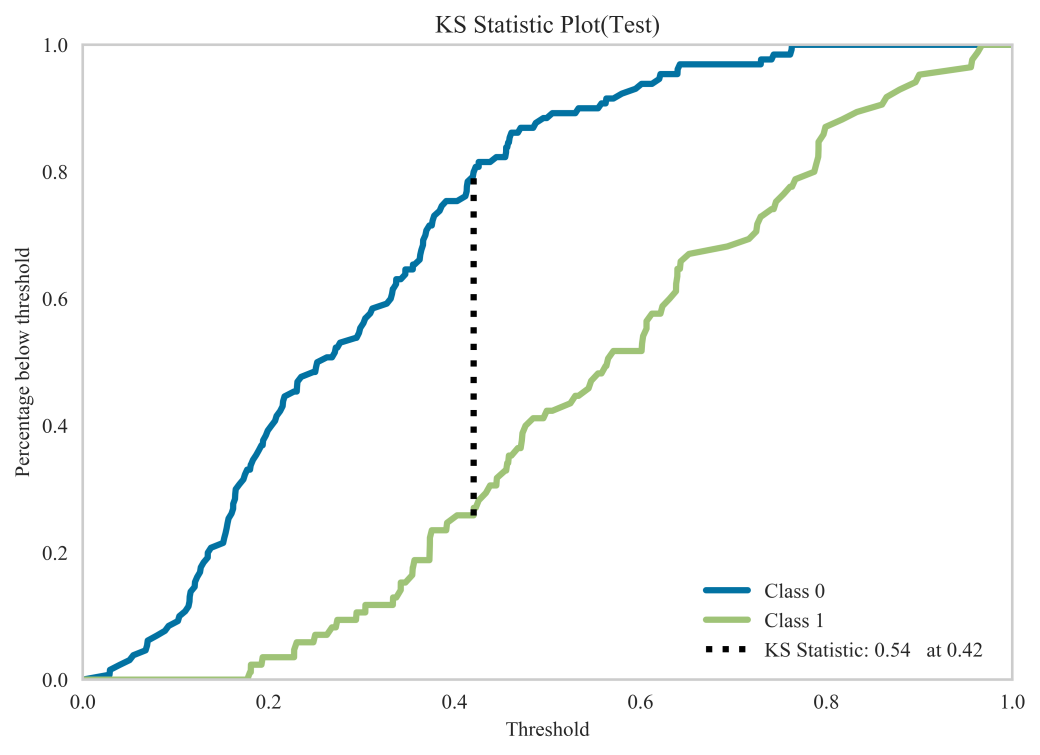


**Fig.S17**

**Fig. S17. Kolmogorov–Smirnov (KS) curve of the RF model in the test cohort. The maximum KS statistic (0.54) was reached at a threshold of 0.42, reflecting strong discrimination between survival and death.**

# Table S10. Abbreviations of Variables and Methods

| Abbreviation | Full Term |
| --- | --- |
| MI | Myocardial Infarction |
| CHF | Congestive Heart Failure |
| CBD | Cerebrovascular Disease |
| CPD | Chronic Pulmonary Disease |
| Diabetes_with_cc | Diabetes with Complications/Comorbidities |
| Renal_disease | Renal Disease |
| Malignant_cancer | Malignant Cancer |
| Severe_liver_disease | Severe Liver Disease |
| Metastatic_solid_tumor | Metastatic Solid Tumor |
| APSⅢ | Acute Physiology Score III |
| SOFA | Sequential Organ Failure Assessment |
| CCI | Charlson Comorbidity Index |
| Hct | Hematocrit |
| Hb | Hemoglobin |
| PLT | Platelet Count |
| WBC | White Blood Cell Count |
| Albumin | Serum Albumin |
| AG | Anion Gap |
| Bicarbonate | Serum Bicarbonate |
| BUN | Blood Urea Nitrogen |
| Cr | Creatinine |
| Sodium | Serum Sodium |
| Potassium | Serum Potassium |
| Fibrinogen | Plasma Fibrinogen |
| INR | International Normalized Ratio |
| PT | Prothrombin Time |
| PTT | Partial Thromboplastin Time |
| ALT | Alanine Aminotransferase |
| ALP | Alkaline Phosphatase |
| AST | Aspartate Aminotransferase |
| Amylase | Serum Amylase |
| Bilirubin_total | Total Bilirubin |
| CK-CPK | Creatine Phosphokinase |
| CK-MB | Creatine Kinase-MB Isoenzyme |
| LDH | Lactate Dehydrogenase |
| HR | Heart Rate |
| SBP | Systolic Blood Pressure |
| DBP | Diastolic Blood Pressure |
| MBP | Mean Blood Pressure |
| RR | Respiratory Rate |
| Temperature | Body Temperature |
| SPO₂ | Peripheral Oxygen Saturation |
| SO₂ | Oxygen Saturation (arterial blood gas) |
| PO₂ | Partial Pressure of Oxygen |
| PCO₂ | Partial Pressure of Carbon Dioxide |
| TotalCO₂ | Total Carbon Dioxide |
| Glucose | Blood Glucose |
| GCS_min | Glasgow Coma Scale (minimum score) |
| XGBoost | Extreme Gradient Boosting |
| LR | Logistic Regression |
| LGBM | Light Gradient Boosting Machine |
| Ada | Adaptive Boosting (AdaBoost) |
| DT | Decision Tree |
| MLP | Multilayer Perceptron |
| RF | Random Forest |
| GNB | Gaussian Naïve Bayes |
| KNN | K-Nearest Neighbors |
| ROC | Receiver Operating Characteristic |
| AUC | Area Under the Curve |
| PR | Precision–Recall |
| PPV | Positive Predictive Value |
| NPV | Negative Predictive Value |
| F1 | F1 Score (harmonic mean of precision and recall) |
| DCA | Decision Curve Analysis |
| CI | Confidence Interval |

**Acknowledgment**

We thank all contributors to the MIMIC-IV database for providing open access to high-quality clinical data. This study was also supported by the Extreme Smart Analysis platform (https://www.xsmartanalysis.com/).
